# Supplementary material for: Functional Organization of the Action Observation Network in Autism: A Graph Theory Approach
Source: PubMed Central journal article supplement (PMC4552824; doi:10.1371/journal.pone.0137020), 2015-08-28

# S1 Figure

Head motion.

Mean frame-wise displacement (mean FD) was assessed for each participant over the entire resting-state fMRI scan. Each individual's value and group mean and standard deviations are displayed.

Mean FD was not significantly different between groups (ASD, TC) ( $t(56) = -.07$ ;  $p > .05$ ) and did not exceed 0.5 mm in any of the participants.

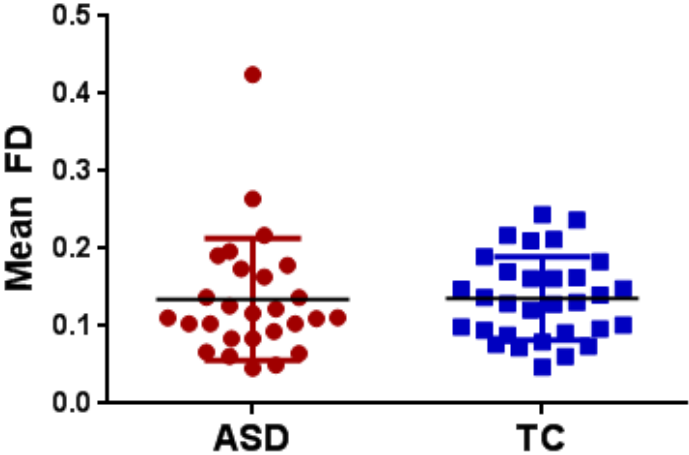

Supplement: pone.0137020.s001.pdf [file pone.0137020.s001.pdf]
