# Supplementary material for: Functional Organization of the Action Observation Network in Autism: A Graph Theory Approach
Source: PubMed Central journal article supplement (PMC4552824; doi:10.1371/journal.pone.0137020), 2015-08-28
Supplement: pone.0137020.s005.pdf [file pone.0137020.s005.pdf]

## S1 Table

Group characteristics for the ASD and TC participants (adolescents and adults separately).

|                       | Adolescents |      |           |      | Adults     |      |           |      |
|-----------------------|-------------|------|-----------|------|------------|------|-----------|------|
|                       | ASD (n=12)  |      | TC (n=16) |      | ASD (n=15) |      | TC (n=15) |      |
| Sex                   | 10 males    |      | 13 males  |      | All males  |      | All males |      |
|                       | mean        | SD   | mean      | SD   | mean       | SD   | mean      | SD   |
| SRS Scores            | 95.1        | 28.0 |           |      | 91.5       | 28.5 |           |      |
| Age (years)           | 13.8        | 1.1  | 14.2      | 1.6  | 21.7       | 4.0  | 23.3      | 2.9  |
| Verbal IQ             | 90.3        | 15.5 | 115.8     | 12.3 | 109.1      | 12.9 | 117.4     | 9.9  |
| Performance IQ        | 100.3       | 11.2 | 106.7     | 8.8  | 105.6      | 19.3 | 109.1     | 17.7 |
| Head Motion (mean FD) | 0.18        | 0.09 | 0.17      | 0.04 | 0.09       | 0.04 | 0.10      | 0.04 |

ASD. autism spectrum disorder; TC. typical controls; SRS. Social Responsiveness Scale (raw Total); IQ. intelligence quotient; mean FD. mean framewise displacement; SD. standard deviation.
